# Supplementary material
Source: MDPI journal article supplement (https://www.mdpi.com/2071-1050/16/6/2269)
Supplement: s1 [file s1]

## Supplementary Materials

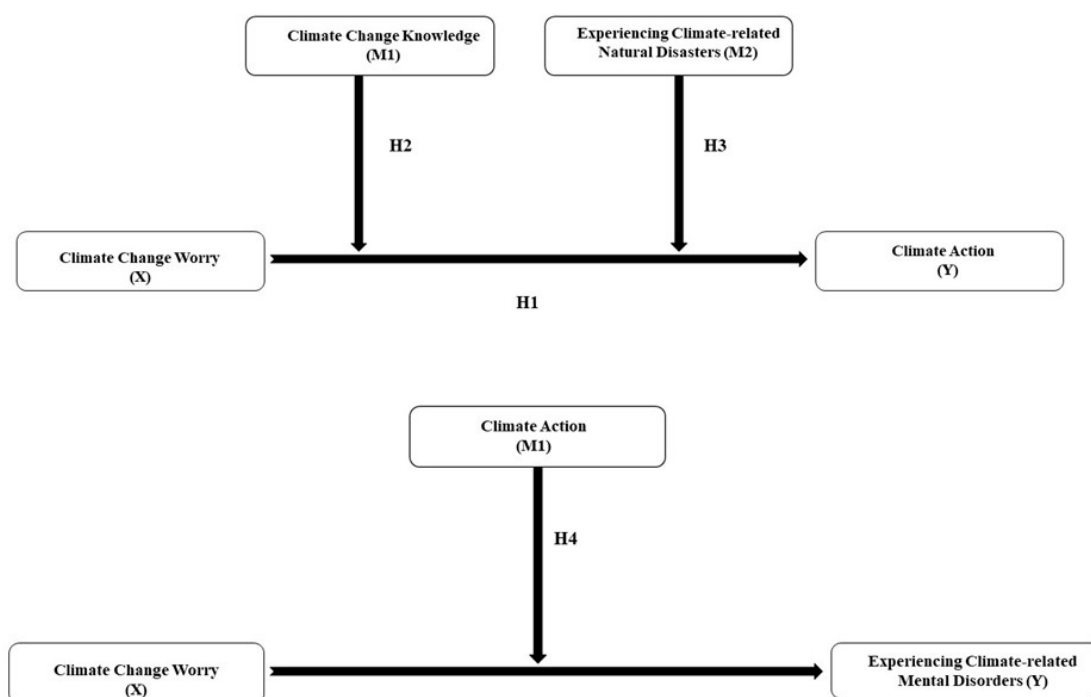

**Figure S1.** Hypotheses of the research regarding moderating roles.

**Table S1.** Individuals' reliability analysis results for the Climate Change Worry Scale.

| Item | Mean  | SD    | AC    | AWIR  | Alpha |
|------|-------|-------|-------|-------|-------|
| L1   | 3.196 | 1.037 | 0.690 | 0.910 | 0.918 |
| L2   | 3.457 | 1.071 | 0.701 | 0.910 |       |
| L3   | 2.877 | 1.042 | 0.614 | 0.914 |       |
| L4   | 3.637 | 1.083 | 0.719 | 0.909 |       |
| L5   | 3.558 | 1.076 | 0.706 | 0.909 |       |
| L6   | 2.968 | 1.184 | 0.766 | 0.906 |       |
| L7   | 3.067 | 1.204 | 0.736 | 0.907 |       |
| L8   | 2.878 | 1.175 | 0.662 | 0.912 |       |
| L9   | 2.472 | 1.152 | 0.662 | 0.912 |       |
| L10  | 3.232 | 1.223 | 0.691 | 0.910 |       |

Mean, SD: Standard deviation, AC: Adjusted correlation, AWIR: Alpha when the item is removed

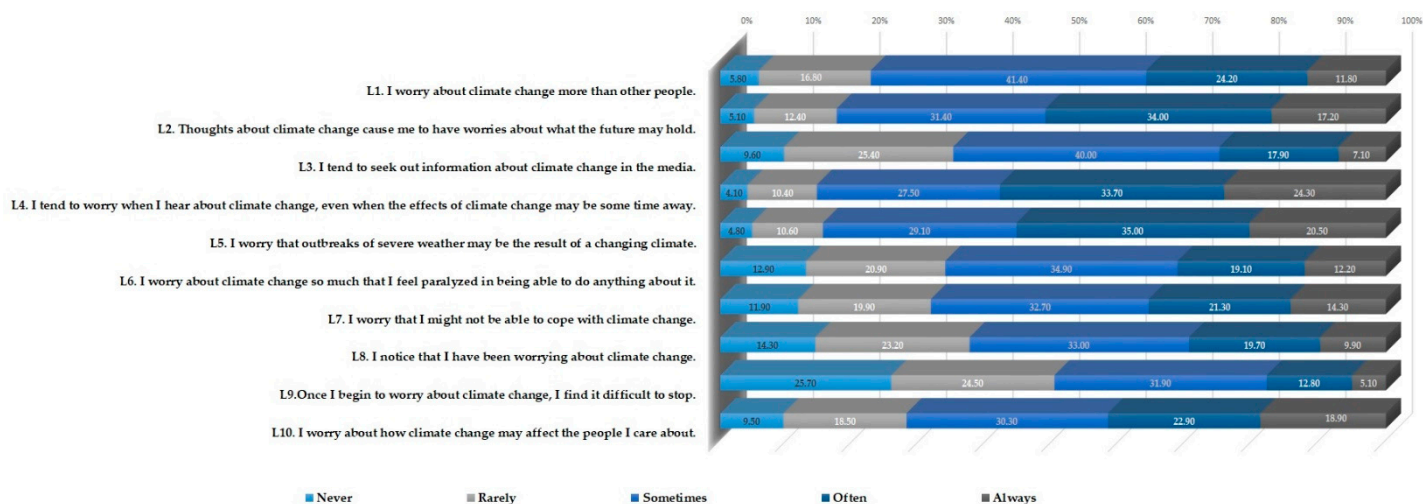

**Figure S2.** Distribution of participants' responses to Climate Change Worry Scale items.

**Table S2.** Socio-demographic characteristics of the participants.

| <b>Characteristics (n=1229)</b>                                                     | <b>n</b>  | <b>%</b> |
|-------------------------------------------------------------------------------------|-----------|----------|
| <b>Gender</b>                                                                       |           |          |
| Male                                                                                | 383       | 31.2     |
| Female                                                                              | 846       | 68.8     |
| <b>Age (years)</b>                                                                  |           |          |
| 18-25                                                                               | 615       | 50.0     |
| 26-33                                                                               | 221       | 18.0     |
| 34-41                                                                               | 157       | 12.8     |
| 42-49                                                                               | 135       | 11.0     |
| 50-57                                                                               | 61        | 5.0      |
| 58-65                                                                               | 40        | 3.3      |
| <b>Educational status</b>                                                           |           |          |
| Primary education                                                                   | 59        | 4.8      |
| High school                                                                         | 199       | 16.2     |
| Associate degree                                                                    | 423       | 34.4     |
| Bachelor's                                                                          | 401       | 32.6     |
| Master's degree                                                                     | 147       | 12.0     |
| <b>Region of residence in Turkey</b>                                                |           |          |
| Coastal areas (Marmara, Aegean, The Mediterranean and Black Sea Region)             | 751       | 61.1     |
| Interior regions (Central Anatolia, Eastern Anatolia and Southeast Anatolia Region) | 478       | 38.9     |
| <b>Employment status</b>                                                            |           |          |
| Employed                                                                            | 493       | 40.1     |
| Unemployed                                                                          | 239       | 19.4     |
| Student                                                                             | 497       | 40.4     |
| <b>Economic status</b>                                                              |           |          |
| High income                                                                         | 287       | 23.4     |
| Middle income                                                                       | 754       | 61.4     |
| Low income                                                                          | 188       | 15.3     |
| <b>Marital status</b>                                                               |           |          |
| Married                                                                             | 489       | 39.8     |
| Single                                                                              | 712       | 57.9     |
| Widowed/Divorced/Separated                                                          | 28        | 2.3      |
| <b>Status of having children (n=517)</b>                                            |           |          |
| Yes                                                                                 | 432       | 83.6     |
| No                                                                                  | 85        | 16.4     |
| <b>Number of children (n=432)</b>                                                   |           |          |
| 1                                                                                   | 131       | 30.3     |
| 2                                                                                   | 186       | 41.1     |
| 3                                                                                   | 75        | 17.4     |
| 4 or above                                                                          | 40        | 9.3      |
| <b>Number of children (number) M ± SD</b>                                           | 2.12±1.15 |          |
